# Supplementary material for: Implications of pneumonitis after chemoradiation and durvalumab for locally advanced non-small cell lung cancer
Source: PubMed Central journal article supplement — J Thorac Dis. 2020 Nov;12(11):6690–700. doi: 10.21037/jtd-20-1792 (PMC7711405; doi:10.21037/jtd-20-1792), 2020-11
Supplement: jtd-12-11-6690-dss.pdf [file jtd-12-11-6690-dss.pdf]

## Data Sharing Statement

|                     |                                                                                                                                                    |                                                            |
|---------------------|----------------------------------------------------------------------------------------------------------------------------------------------------|------------------------------------------------------------|
| <b>Article Info</b> | <a href="http://dx.doi.org/10.21037/jtd-20-1792">http://dx.doi.org/10.21037/jtd-20-1792</a> .                                                      |                                                            |
| <b>Item</b>         | <b>Question</b>                                                                                                                                    | <b>Authors' Response<br/>(place "-" if not applicable)</b> |
| 1                   | Would you like to share data collected for your study to others?                                                                                   | Yes                                                        |
| 2                   | If not, would you like to share the reason for your decision?                                                                                      | -                                                          |
| 3                   | What data in particular will be shared?                                                                                                            | Pneumonitis and survival outcomes                          |
| 4                   | Any other documents will be share? Such as study protocol, statistical analysis plan, informed consent form, clinical study report, analytic code. | Statistical analysis                                       |
| 5                   | When will data availability begin?                                                                                                                 | Upon publication                                           |
| 6                   | When will data availability end?                                                                                                                   | 2 years after publication                                  |
| 7                   | To whom will you share the data?                                                                                                                   | Anyone requesting access to the data                       |
| 8                   | For what type of analysis or purpose?                                                                                                              | For verification of results or to build upon prior studies |
| 9                   | How or where can the data/documents be obtained?                                                                                                   | Upon request the data will be provided by the authors      |
| 10                  | Any other restrictions?                                                                                                                            | -                                                          |
